# Supplementary material for: The landscape of prognostic and immunological role of myosin light chain 9 (MYL9) in human tumors
Source: PubMed Central journal article supplement (PMC8767521; doi:10.1002/iid3.557), 2021-11-02
Supplement: IID3-10-241-s001.pdf [file IID3-10-241-s001.pdf]

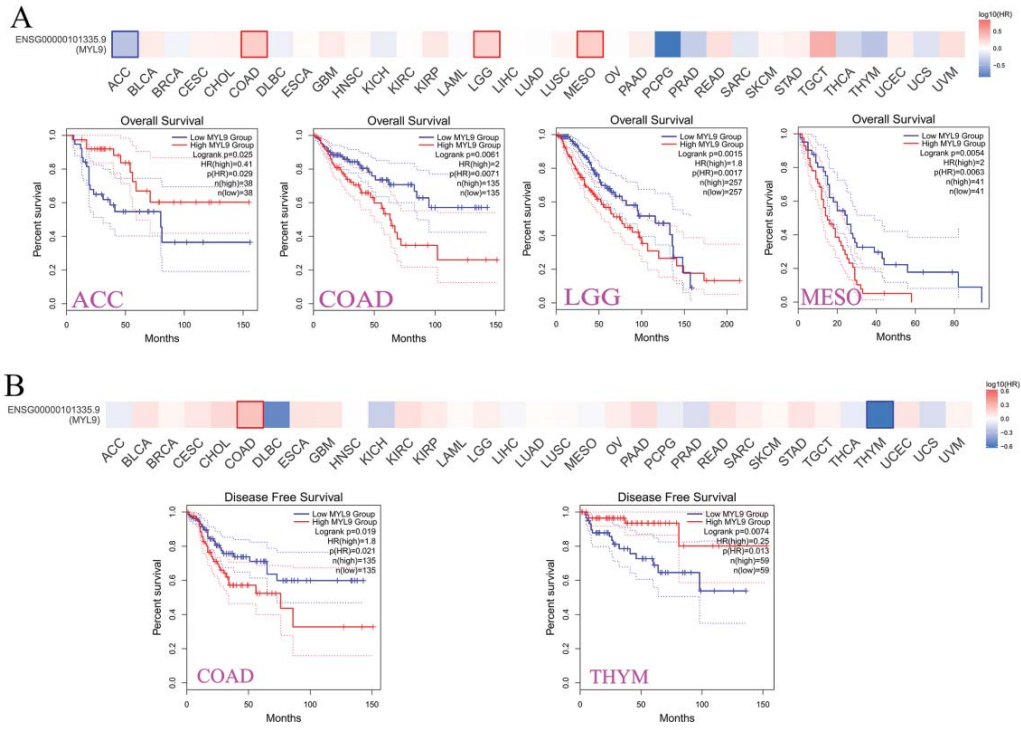

Figure S1 The prognosis analysis of MYL9 gene expression in TCGA dataset for different tumors.

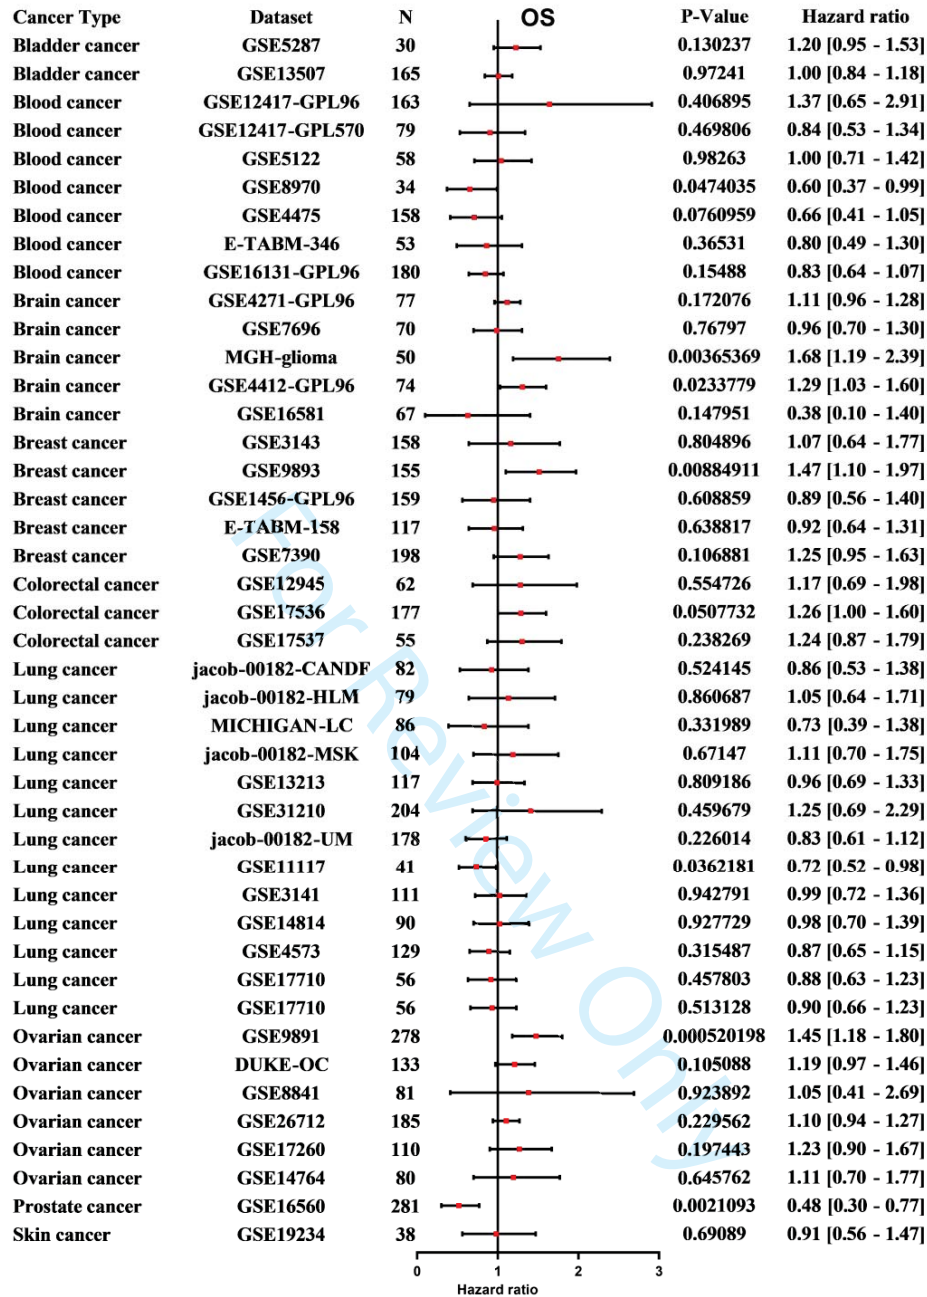

Figure S2 Relation between MYL9 expression ratio and patient prognosis of different cancer (Overall Survival) in Prognoscan database.

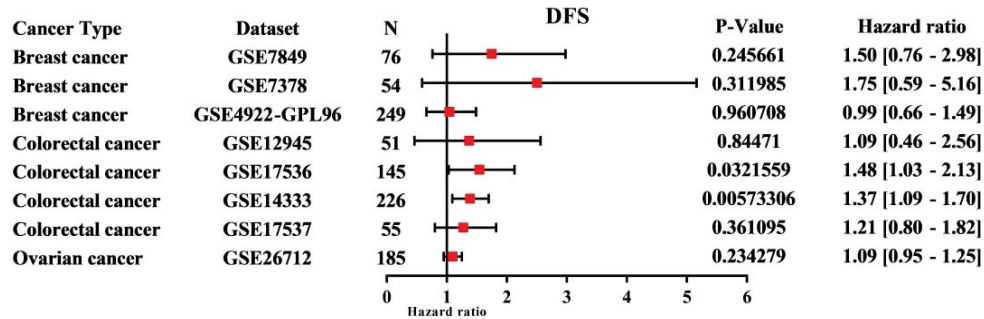

Figure S3 Relation between MYL9 expression and patient prognosis of different cancer (Disease Free Survival) in Prognoscan database.

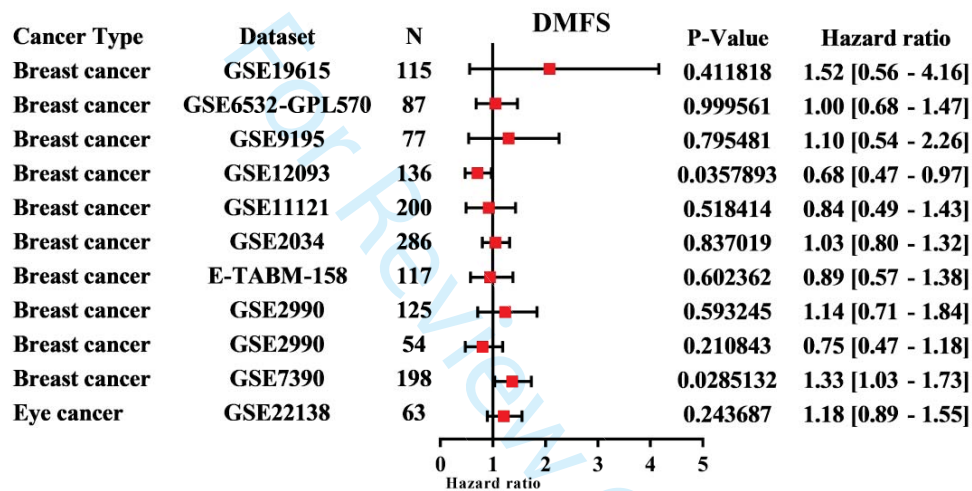

Figure S4 Relation between MYL9 expression and patient prognosis of different cancer (Distant Metastasis Free Survival) in Prognoscan database.

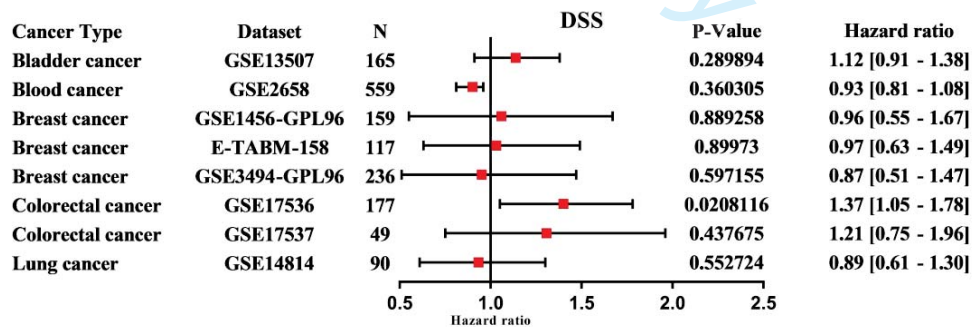

Figure S5 Relation between MYL9 expression and patient prognosis of different cancer (Disease Specific Survival) in Prognoscan database.

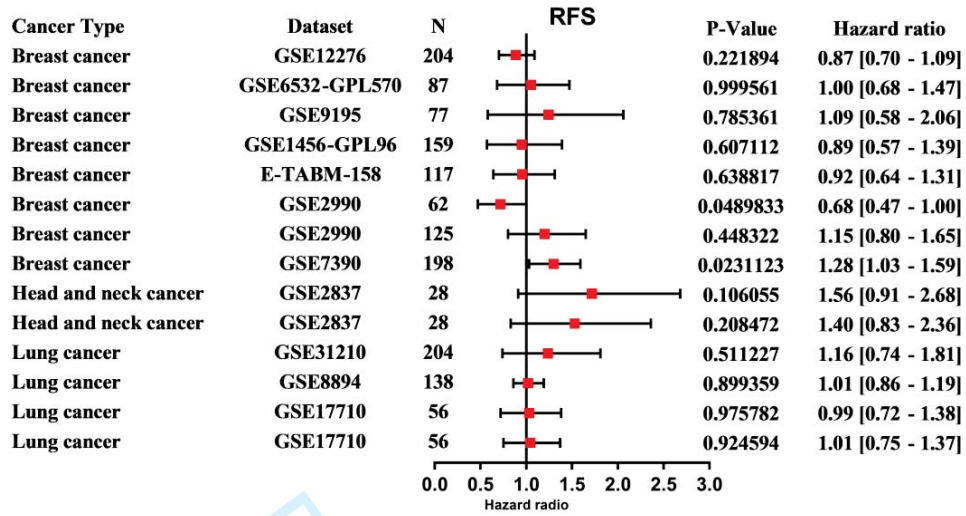

Figure S6 Relation between MYL9 expression and patient prognosis of different cancer (Relapse Free Survival) in Prognoscan database.

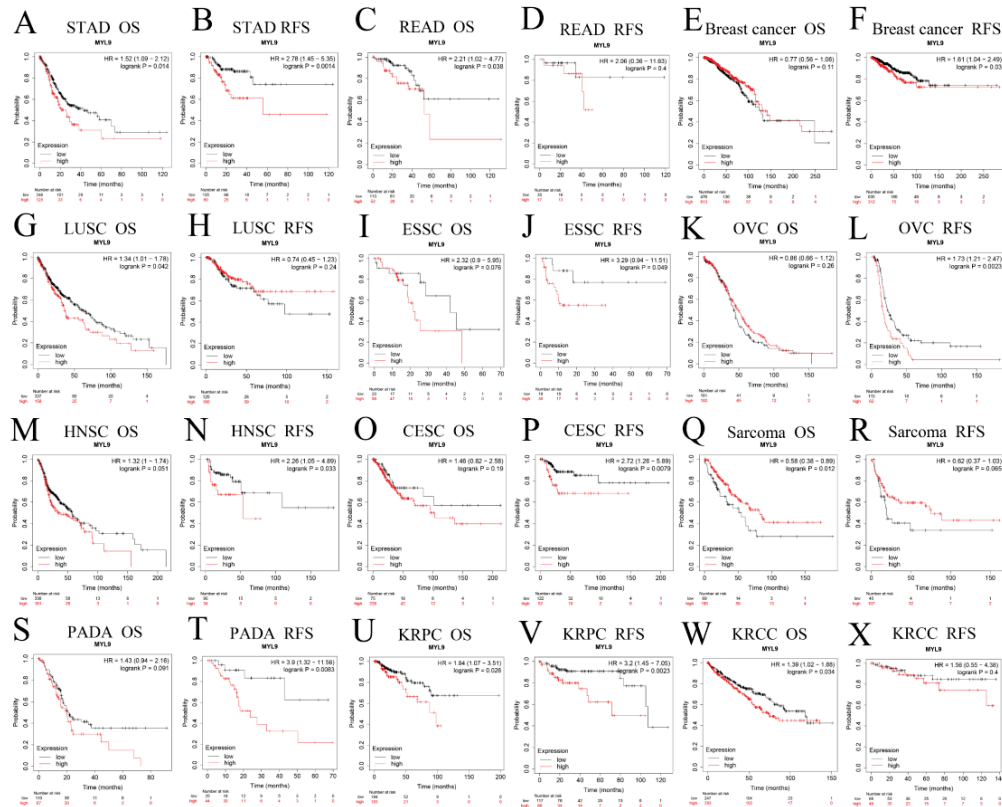

Figure S7 Survival analysis data of MYL9 mRNA expression in Kaplan-Meier RNA-seq dataset



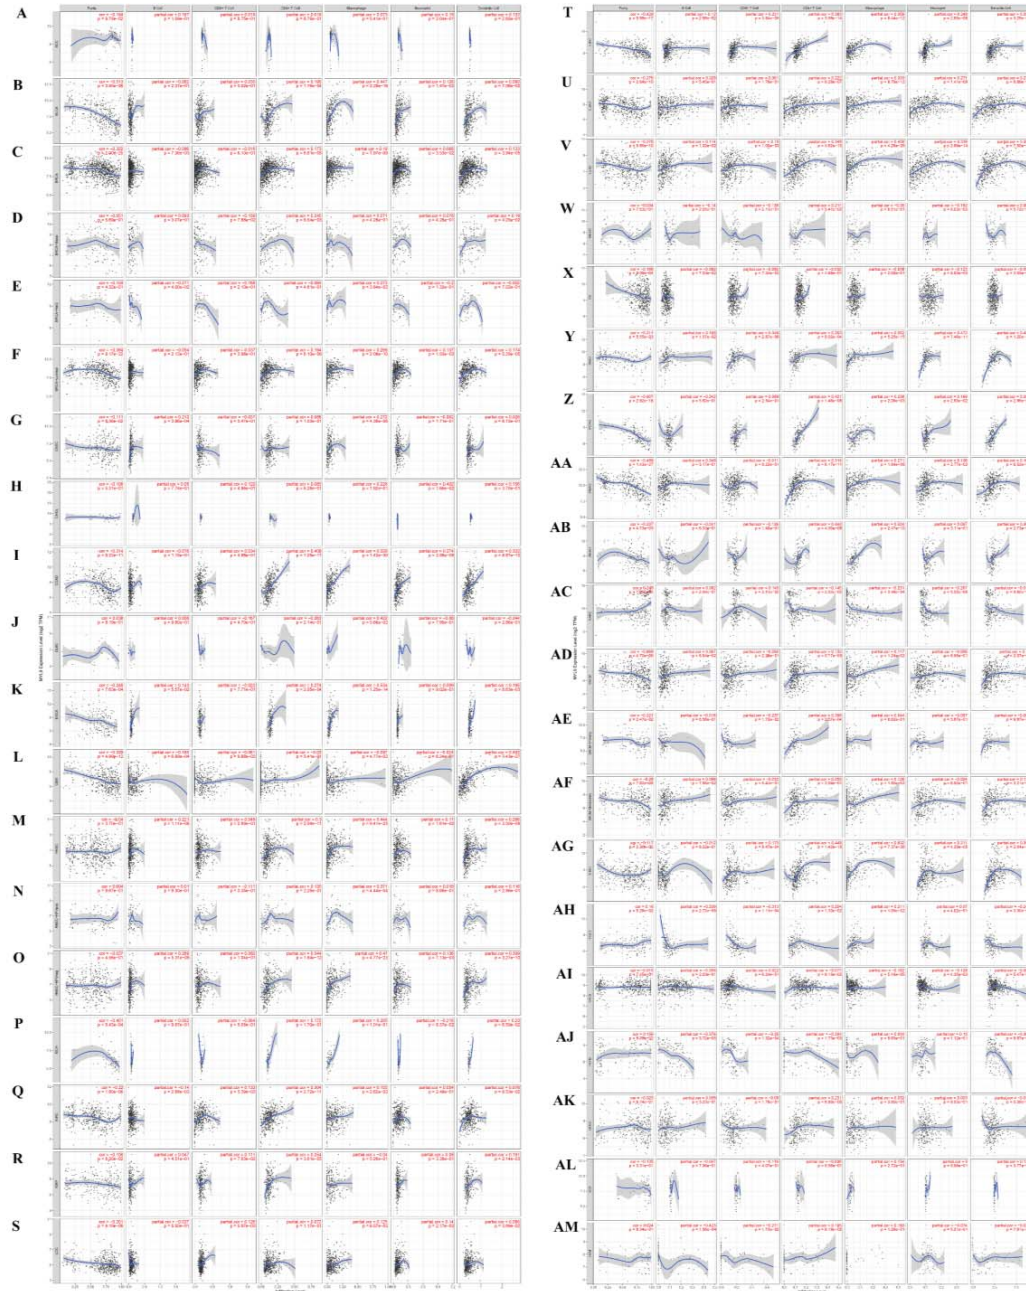

**Figure S8 Correlation of MYL9 expression with immune infiltration levels in TIMER.**

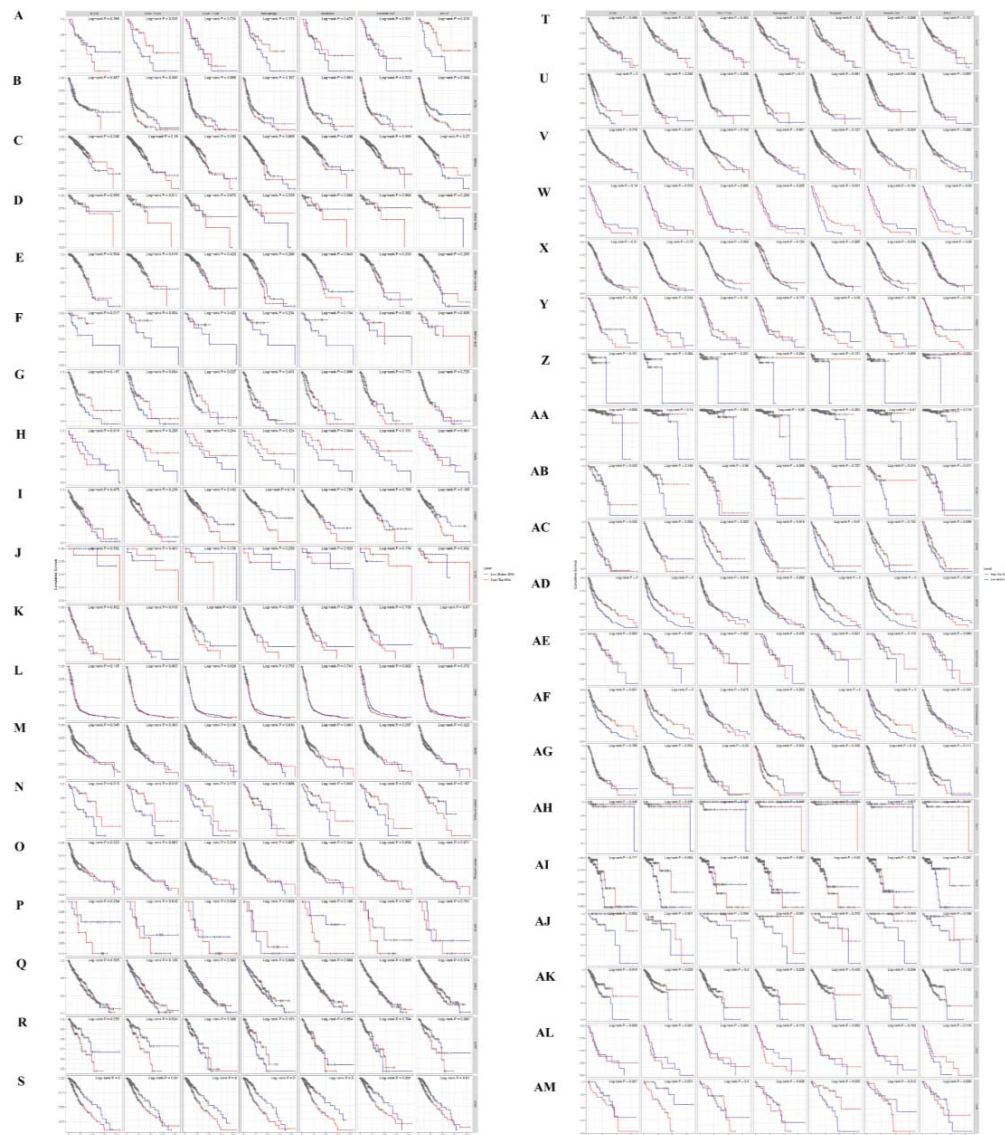

Figure S9 Kaplan-Meier plots of immune infiltration and MYL9 expression levels in TIMER.
